# Supplementary material
Source: PubMed Central journal article supplement (PMC6824314)

Supplemental Table 1. Overview of Experimental Groups.

| Genotype                                                                  | Diet | Surgery | Number |
|---------------------------------------------------------------------------|------|---------|--------|
| 1. GcgRA-VilCreERT2 mouse cohort: Various nutrient-stimulated GLP-1 study |      |         |        |
| a. VilCreERT2                                                             | Chow | N/A     | 17     |
| b. GcgRA <sup>VilCreERT2</sup>                                            | Chow | N/A     | 10     |
| 2. GcgRA-Pdx1Cre mouse cohort: Chow vs. HFD study                         |      |         |        |
| a. Pdx1Cre                                                                | Chow | N/A     | 7      |
| b. Pdx1Cre                                                                | HFD  | N/A     | 6      |
| c. GcgRA <sup>ΔNull</sup>                                                 | Chow | N/A     | 7      |
| d. GcgRA <sup>ΔNull</sup>                                                 | HFD  | N/A     | 5      |
| e. GcgRA <sup>ΔPdx1Cre</sup>                                              | Chow | N/A     | 8      |
| f. GcgRA <sup>ΔPdx1Cre</sup>                                              | HFD  | N/A     | 11     |
| 3. GcgRA-VilCre mouse cohort: Chow vs. HFD study                          |      |         |        |
| a. VilCre                                                                 | Chow | N/A     | 7      |
| b. VilCre                                                                 | HFD  | N/A     | 7      |
| c. GcgRA <sup>ΔNull</sup>                                                 | Chow | N/A     | 6      |
| d. GcgRA <sup>ΔNull</sup>                                                 | HFD  | N/A     | 6      |
| e. GcgRA <sup>ΔVilCre</sup>                                               | Chow | N/A     | 7      |
| f. GcgRA <sup>ΔVilCre</sup>                                               | HFD  | N/A     | 7      |
| 4. GcgRA-Pdx1Cre mouse cohort: Sham vs. VSG study                         |      |         |        |
| a. Pdx1Cre                                                                | HFD  | Sham    | 8      |
| b. Pdx1Cre                                                                | HFD  | VSG     | 8      |
| c. GcgRA <sup>ΔPdx1Cre</sup>                                              | HFD  | Sham    | 8      |
| d. GcgRA <sup>ΔPdx1Cre</sup>                                              | HFD  | VSG     | 9      |
| 5. GcgRA-VilCre mouse cohort: Sham vs. VSG study                          |      |         |        |
| a. VilCre                                                                 | HFD  | Sham    | 7      |
| b. VilCre                                                                 | HFD  | VSG     | 9      |
| c. GcgRA <sup>ΔNull</sup>                                                 | HFD  | Sham    | 7      |
| d. GcgRA <sup>ΔNull</sup>                                                 | HFD  | VSG     | 7      |
| e. GcgRA <sup>ΔVilCre</sup>                                               | HFD  | Sham    | 6      |
| f. GcgRA <sup>ΔVilCre</sup>                                               | HFD  | VSG     | 6      |

# All male mice; experiments starting age between 2 mon- 4 mon old.

### **Supplementary Figure 1. GcgRA mouse cohorts validation.**

(A-H) *Gcg* gene expression from duodenum, jejunum, ileum, and hindbrain of Sham or VSG *GcgRA-Pdx1Cre* (A-D) and *GcgRA-VilCre* (E-H) mouse cohorts. *Pdx1Cre*: Sham (n=8), VSG (n=8); *GcgRA* <sup>$\Delta$ Pdx1Cre</sup>: Sham (n=8), VSG (n=9); *VilCre*: Sham (n=7), VSG (n=9); *GcgRA* <sup>$\Delta$ Null</sup>: Sham (n=7), VSG (n=7); *GcgRA* <sup>$\Delta$ VilCre</sup>: Sham (n=6), VSG (n=6). (I) Representative (of n=4/surgery/genotype) immunofluorescence images of pancreatic islets (bar = 100  $\mu$ m). The transcription stop-cassette innervating in the *Gcg* gene expresses GFP. Glucagon is observed in *GcgRA* <sup>$\Delta$ Pdx1Cre</sup> mice whereas GFP is not observed. GFP, but not glucagon, is observed in *GcgRA* <sup>$\Delta$ Null</sup> and *GcgRA* <sup>$\Delta$ VilCre</sup> mice.

### **Supplementary Figure 2. VSG-induced weight loss in GcgRA mouse cohorts.**

BW change during the 10 weeks after sham or VSG surgery in *Pdx1Cre* (A), *GcgRA* <sup>$\Delta$ Pdx1Cre</sup> (B), *VilCre* (C), *GcgRA* <sup>$\Delta$ Null</sup> (D), *GcgRA* <sup>$\Delta$ VilCre</sup> (E) mice. All data were obtained from cohorts 4 & 5 and are represented as Mean  $\pm$  SEM. \*P<0.05; \*\*P<0.01 (surgery  $\times$  time). *Pdx1Cre*: Sham (n=8), VSG (n=8); *GcgRA* <sup>$\Delta$ Pdx1Cre</sup>: Sham (n=8), VSG (n=9); *VilCre*: Sham (n=7), VSG (n=9); *GcgRA* <sup>$\Delta$ Null</sup>: Sham (n=7), VSG (n=7); *GcgRA* <sup>$\Delta$ VilCre</sup>: Sham (n=6), VSG (n=6).

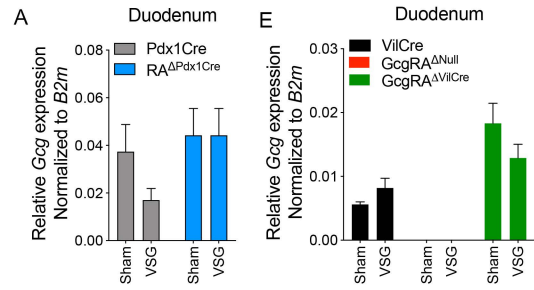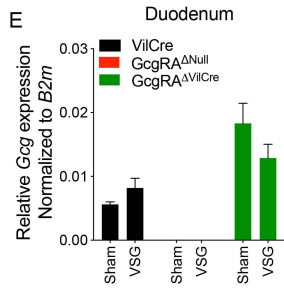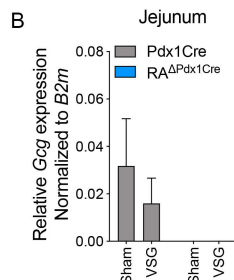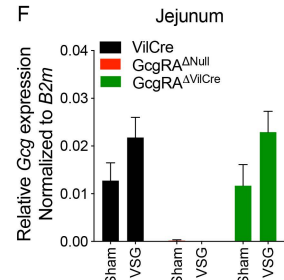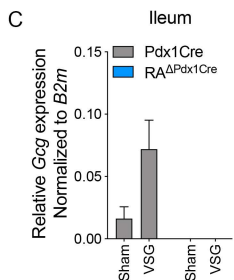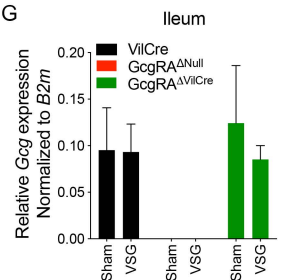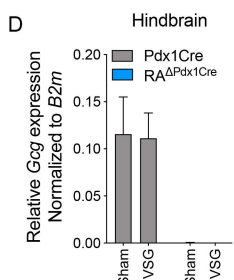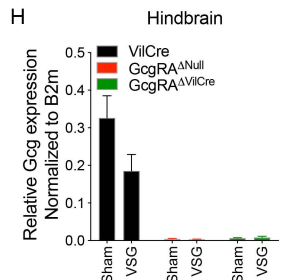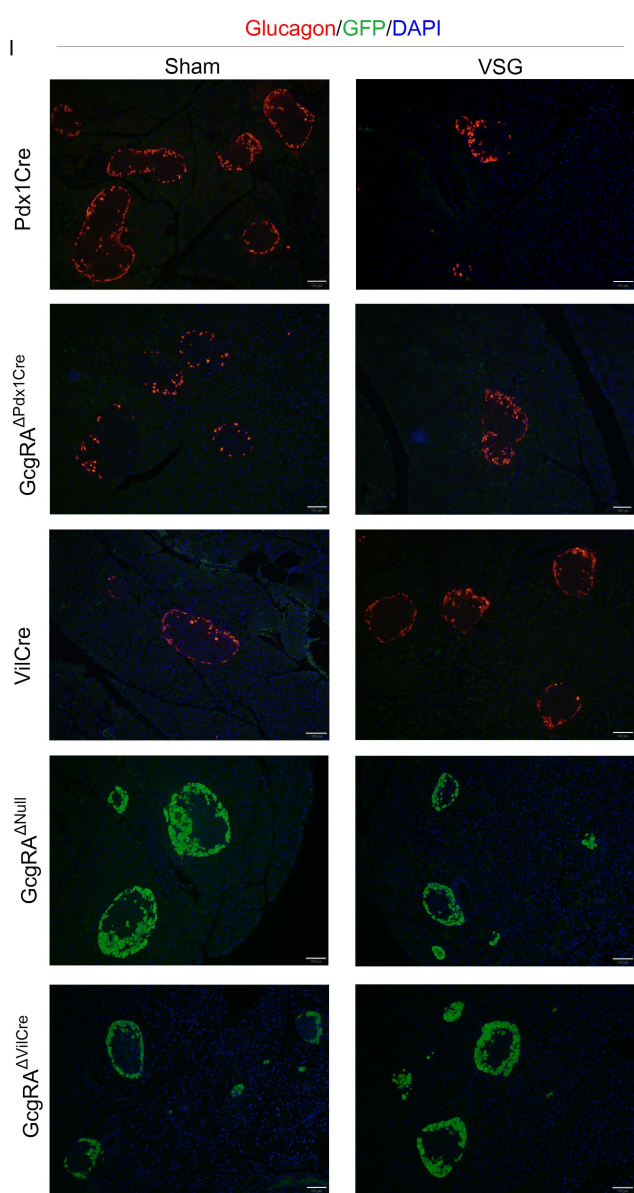

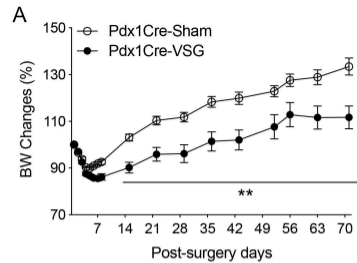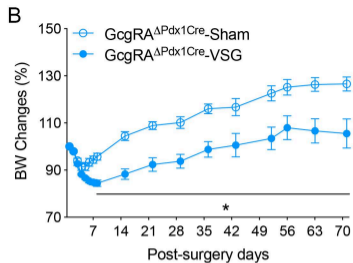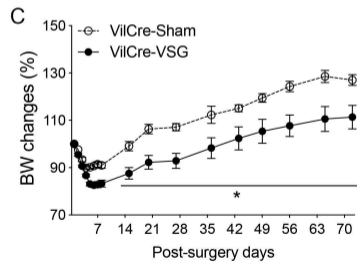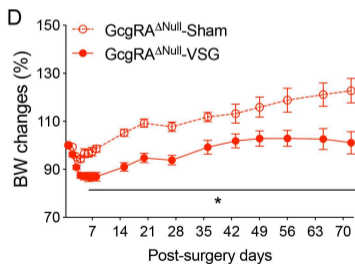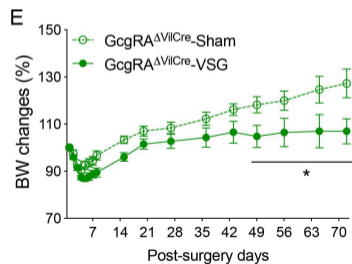

Supplement: jciinsight-4-129452-s116.pdf [file jciinsight-4-129452-s116.pdf]
